# Supplementary material
Source: HighWire-hosted journal article supplement (https://erj.ersjournals.com/content/56/2/2002195)
Supplement: inline-supplementary-material-1 [file inline-supplementary-material-1.pdf]

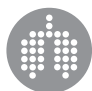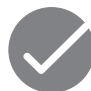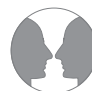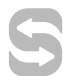

SHAREABLE PDF

# COVID-19 phenotypes: leading or misleading?

Luciano Gattinoni <sup>1</sup>, Luigi Camporota<sup>2</sup> and John J. Marini<sup>3</sup>

**Affiliations:** <sup>1</sup>Dept of Anesthesiology, Emergency and Intensive Care Medicine, University of Göttingen, Göttingen, Germany. <sup>2</sup>Dept of Adult Critical Care, Guy's and St Thomas' NHS Foundation Trust, King's Health Partners, and Division of Asthma, Allergy and Lung Biology, King's College London, London, UK. <sup>3</sup>Regions Hospital and University of Minnesota, St Paul, MN, USA.

**Correspondence:** Luciano Gattinoni, University of Göttingen, Dept of Anesthesiology, Robert-Koch-Straße 40, 37075 Göttingen, Germany. E-mail: gattinoniluciano@gmail.com

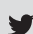

@ERSpublications

**Comment on the editorial by Bos *et al.* about “perils of premature phenotyping in COVID-19”, querying the risks of COVID-19 phenotypes and how the arguments put forward can further the cause of patients and clinicians** <https://bit.ly/2Y6VZz9>

**Cite this article as:** Gattinoni L, Camporota L, Marini JJ. COVID-19 phenotypes: leading or misleading?. *Eur Respir J* 2020; 56: 2002195 [<https://doi.org/10.1183/13993003.02195-2020>].

This single-page version can be shared freely online.

*To the Editor:*

We read the editorial by Bos *et al.* [1] with a mixture of interest, irritation and serious concern.
